# Supplementary material
Source: Springer Nature journal article supplement (https://www.springermedizin.de/resource/supplementary/12889_2012_5040_MOESM5_ESM.pdf/9494538)

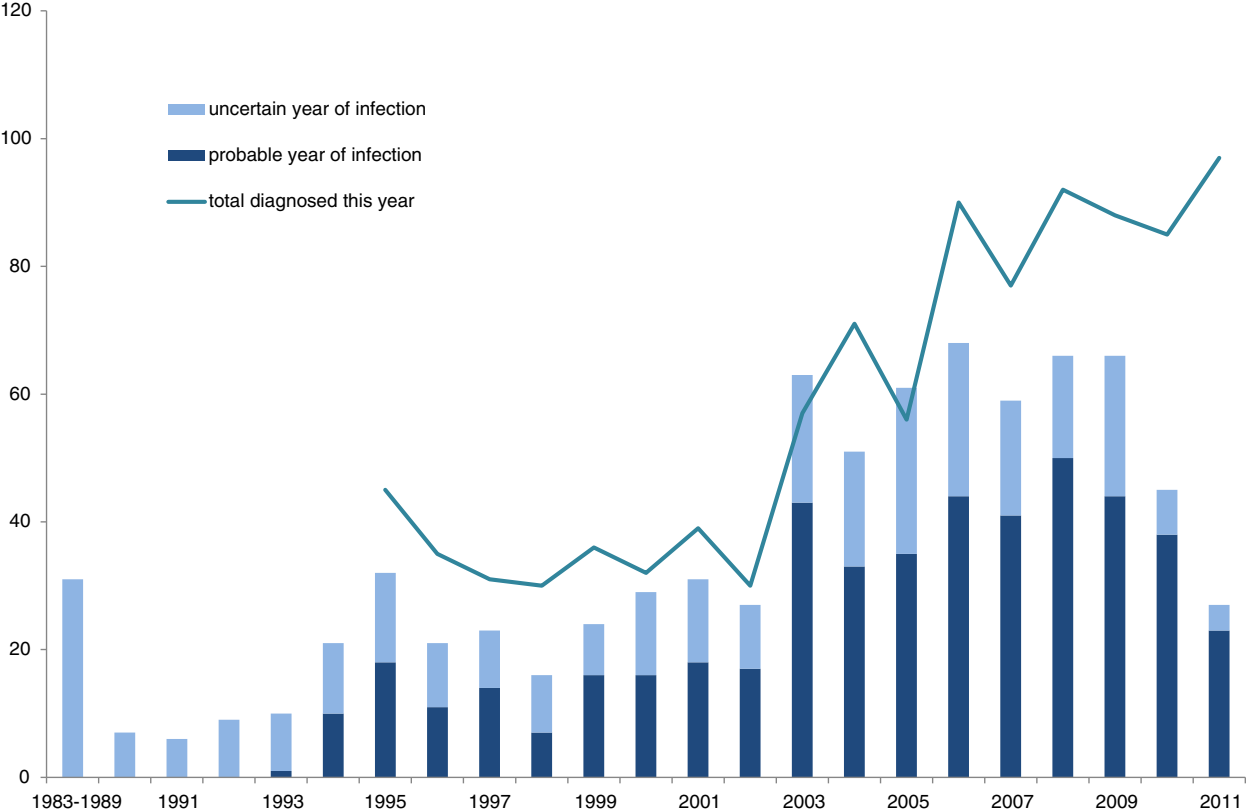

Supplement: MOESM5 [file 9494538]
